# Supplementary material
Source: publisher site journal article supplement (http://kjim.org/upload/media/kjim-2019-020-suppl1.pdf)
Supplement: Supplementary file 1 [file kjim-2019-020-suppl1.pdf]

Supplementary Table 1. Multivariate analysis on the risk factors for stroke, myocardial infarction, cardiovascular disease and herpes zoster<sup>a</sup>

| Parameter                              | Stroke              |         | MI                  |         | Cardiovascular disease |         | Zoster              |         |
|----------------------------------------|---------------------|---------|---------------------|---------|------------------------|---------|---------------------|---------|
|                                        | HR (95% CI)         | p value | HR (95% CI)         | p value | HR (95% CI)            | p value | OR (95% CI)         | p value |
| Statin                                 | 0.875 (0.793-0.966) | 0.008   | 0.897 (0.770-1.045) | 0.163   | 0.885 (0.812-0.964)    | 0.0051  | 2.473 (2.319-2.637) | < 0.001 |
| Zoster                                 | 1.182 (1.068-1.308) | 0.001   | 1.274 (1.087-1.493) | 0.003   | 1.224 (1.121-1.336)    | < 0.001 | -                   | -       |
| Age, yr                                |                     |         |                     |         |                        |         |                     |         |
| 41-50                                  | 0.100 (0.093-0.107) | < 0.001 | 0.150 (0.135-0.166) | < 0.001 | 0.115 (0.109-0.122)    | < 0.001 | 1.432 (1.331-1.541) | 0.034   |
| 51-60                                  | 0.224 (0.211-0.237) | < 0.001 | 0.270 (0.246-0.297) | < 0.001 | 0.239 (0.227-0.251)    | < 0.001 | 1.722 (1.602-1.851) | < 0.001 |
| 61-70                                  | 0.497 (0.472-0.523) | < 0.001 | 0.495 (0.454-0.540) | < 0.001 | 0.499 (0.477-0.523)    | < 0.001 | 1.495 (1.388-1.611) | < 0.001 |
| ≥ 71                                   | Ref                 |         | Ref                 |         | Ref                    |         | Ref                 |         |
| Male gender                            | 1.328 (1.265-1.394) | < 0.001 | 1.508 (1.393-1.634) | < 0.001 | 1.392 (1.333-1.453)    | < 0.001 | 0.931 (0.892-0.972) | 0.001   |
| Overweight, BMI ≥ 25 kg/m <sup>2</sup> | 1.006 (0.965-1.048) | 0.777   | 1.096 (1.026-1.171) | 0.006   | 1.037 (1.000-1.075)    | 0.0492  | 0.902 (0.871-0.935) | < 0.001 |
| Cigarette smoking                      |                     |         |                     |         |                        |         |                     |         |
| Non-smoker                             | Ref                 | < 0.001 | Ref                 | < 0.001 | Ref                    | < 0.001 | Ref                 | < 0.001 |
| Ex-smoker                              | 0.935 (0.843-1.036) | 0.201   | 1.170 (1.001-1.367) | 0.049   | 1.002 (0.917-1.095)    | 0.9634  | 1.647 (1.545-1.756) | < 0.001 |
| Current smoker                         | 1.357 (1.284-1.434) | < 0.001 | 1.701 (1.560-1.855) | < 0.001 | 1.450 (1.382-1.521)    | < 0.001 | 0.573 (0.541-0.608) | < 0.001 |
| Unknown                                | 1.026 (0.946-1.113) | 0.540   | 1.176 (1.033-1.339) | 0.014   | 1.058 (0.986-1.137)    | 0.1186  | 0.530 (0.483-0.583) | < 0.001 |
| Alcohol consumption                    |                     |         |                     |         |                        |         |                     |         |
| Non-drinker                            | Ref                 | < 0.001 | Ref                 | < 0.001 | Ref                    | < 0.001 | Ref                 | < 0.001 |
| ≤ Twice per week                       | 0.892 (0.846-0.942) | < 0.001 | 0.791 (0.726-0.861) | < 0.001 | 0.858 (0.819-0.899)    | < 0.001 | 0.809 (0.774-0.845) | < 0.001 |
| ≥ 3 times per week                     | 1.002 (0.940-1.068) | 0.950   | 0.782 (0.705-0.868) | < 0.001 | 0.930 (0.879-0.983)    | 0.0109  | 0.838 (0.788-0.891) | < 0.001 |
| Unknown                                | 1.001 (0.863-1.161) | 0.993   | 0.927 (0.728-1.180) | 0.539   | 0.964 (0.846-1.099)    | 0.5844  | 1.234 (1.068-1.425) | < 0.001 |
| Physical exercise                      |                     |         |                     |         |                        |         |                     |         |
| None                                   | Ref                 | < 0.001 | Ref                 | 0.001   | Ref                    |         | Ref                 | < 0.001 |
| ≤ Twice per week                       | 0.81 (0.766-0.856)  | < 0.001 | 0.887 (0.814-0.966) | 0.006   | 0.831 (0.792-0.872)    | < 0.001 | 1.204 (1.155-1.255) | < 0.001 |
| ≥ 3 times per week                     | 0.824 (0.781-0.869) | < 0.001 | 0.860 (0.790-0.937) | 0.001   | 0.832 (0.794-0.871)    | < 0.001 | 1.141 (1.093-1.192) | 0.003   |
| Unknown                                | 0.994 (0.868-1.140) | 0.936   | 1.024 (0.821-1.276) | 0.835   | 1.027 (0.912-1.156)    | 0.6650  | 0.935 (0.809-1.080) | 0.018   |
| Income                                 |                     |         |                     |         |                        |         |                     |         |
| I (lowest)                             | Ref                 | < 0.001 | Ref                 | < 0.001 | Ref                    | < 0.001 | Ref                 | < 0.001 |
| II                                     | 1.003 (0.940-1.071) | 0.923   | 1.031 (0.927-1.147) | 0.577   | 1.008 (0.952-1.067)    | 0.7828  | 1.018 (0.960-1.079) | 0.498   |
| III                                    | 0.969 (0.909-1.034) | 0.343   | 1.027 (0.925-1.140) | 0.616   | 0.978 (0.924-1.035)    | 0.4378  | 0.990 (0.935-1.049) | 0.028   |

Supplementary Table 1. Continued

| Parameter                                                                            | Stroke               |         | MI                  |         | Cardiovascular disease |         | Zoster              |         |
|--------------------------------------------------------------------------------------|----------------------|---------|---------------------|---------|------------------------|---------|---------------------|---------|
|                                                                                      | HR (95% CI)          | p value | HR (95% CI)         | p value | HR (95% CI)            | p value | OR (95% CI)         | p value |
| IV                                                                                   | 0.935 (0.880-0.994)  | 0.031   | 0.943 (0.853-1.042) | 0.249   | 0.930 (0.881-0.981)    | 0.0079  | 1.016 (0.962-1.072) | 0.372   |
| V (highest)                                                                          | 0.851 (0.804-0.902)  | < 0.001 | 0.858 (0.781-0.943) | 0.001   | 0.845 (0.804-0.889)    | < 0.001 | 1.139 (1.084-1.197) | < 0.001 |
| Hypertension                                                                         | 1.797 (1.691-1.846)  | < 0.001 | 1.503 (1.402-1.612) | < 0.001 | 1.674 (1.611-1.739)    | < 0.001 | 0.991 (0.954-1.029) | 0.630   |
| Diabetes                                                                             | 1.470 (1.405-1.537)  | < 0.001 | 1.443 (1.341-1.553) | < 0.001 | 1.455 (1.398-1.514)    | < 0.001 | 1.064 (1.017-1.113) | 0.007   |
| Dyslipidemia                                                                         | 1.056 (1.006-1.108)  | 0.026   | 1.248 (1.158-1.346) | < 0.001 | 1.102 (1.057-1.149)    | < 0.001 | 1.232 (1.181-1.285) | < 0.001 |
| Ischemic heart disease (Izo)                                                         | 1.131 (1.045-1.225)  | 0.002   | 1.485 (1.318-1.673) | < 0.001 | 1.239 (1.157-1.327)    | < 0.001 | 1.123 (1.041-1.212) | 0.003   |
| Transient ischemic attack                                                            | 1.667 (1.471-1.890)  | < 0.001 | 1.002 (0.773-1.299) | 0.987   | 1.544 (1.375-1.733)    | < 0.001 | 1.230 (1.061-1.426) | 0.006   |
| Heart failure                                                                        | 1.219 (1.107-1.341)  | < 0.001 | 1.614 (1.397-1.865) | < 0.001 | 1.309 (1.204-1.422)    | < 0.001 | 1.076 (0.964-1.200) | 0.192   |
| Atrial fibrillation                                                                  | 1.737 (1.492-2.022)  | < 0.001 | 1.214 (0.927-1.592) | 0.159   | 1.573 (1.370-1.806)    | < 0.001 | 1.283 (1.067-1.542) | 0.008   |
| Valvular heart disease                                                               | 1.220 (0.967-1.538)  | 0.093   | 1.346 (0.933-1.940) | 0.112   | 1.256 (1.024-1.541)    | 0.0287  | 0.913 (0.696-1.198) | 0.512   |
| Chronic renal disease                                                                | 1.292 (1.097-1.522)  | 0.002   | 1.265 (0.971-1.649) | 0.082   | 1.293 (1.119-1.494)    | 0.0005  | 1.047 (0.895-1.225) | 0.562   |
| Carotid stenosis                                                                     | 2.037 (1.264-3.285)  | 0.004   | 0.301 (0.042-2.141) | 0.230   | 1.659 (1.043-2.637)    | 0.0325  | 1.292 (0.826-2.020) | 0.262   |
| Peripheral vascular disease                                                          | 1.168 (1.083-1.260)  | < 0.001 | 0.992 (0.869-1.133) | 0.905   | 1.121 (1.047-1.200)    | 0.0011  | 1.871 (1.763-1.987) | < 0.001 |
| Chronic liver disease                                                                | 1.357 (1.137-1.619)  | 0.001   | 1.211 (0.900-1.629) | 0.207   | 1.346 (1.153-1.572)    | 0.0002  | 1.183 (1.009-1.387) | 0.038   |
| Rheumatoid disease                                                                   | 1.153 (1.061-1.252)  | 0.001   | 1.272 (1.113-1.453) | < 0.001 | 1.173 (1.090-1.262)    | < 0.001 | 1.376 (1.279-1.480) | < 0.001 |
| Inflammatory bowel disease                                                           | 0.781 (0.552-1.105)  | 0.162   | 1.039 (0.635-1.698) | 0.880   | 0.832 (0.619-1.119)    | 0.2245  | 1.007 (0.749-1.354) | 0.963   |
| Malignancy including solid cancer and hematologic malignancy                         | 1.064 (0.961-1.179)  | 0.235   | 1.023 (0.863-1.214) | 0.790   | 1.052 (0.961-1.152)    | 0.2750  | 1.655 (1.533-1.787) | < 0.001 |
| Recipients of solid organ transplantation or hematopoietic stem cell transplantation | 1.329 (0.491-3.594)  | 0.575   | 1.621 (0.395-6.662) | 0.503   | 1.226 (0.504-2.984)    | 0.6531  | 1.113 (0.545-2.274) | 0.769   |
| Human immunodeficiency virus infection                                               | 1.499 (0.211-10.647) | 0.686   | NC                  | NC      | 1.145 (0.161-8.129)    | 0.8926  | 1.043 (0.131-8.306) | 0.968   |
| Depression                                                                           | 1.210 (1.002-1.461)  | 0.047   | 1.007 (0.718-1.412) | 0.970   | 1.155 (0.975-1.369)    | 0.0962  | 1.200 (1.017-1.417) | 0.031   |

MI, myocardial infarction; HR, hazard ratios; CI, confidence interval; OR, odds ratio; BMI, body mass index; NC, not applicable.

<sup>a</sup>Adjusted for age, male gender, hypertension, hyperlipidemia, ischemic heart disease, diabetes, heart failure, peripheral vascular disease, arterial fibrillation or atrial flutter, renal disease, and valvular heart disease.
